# Supplementary material for: Development, Optimisation and Validation of a Novel Multiplex Real-Time PCR Method for the Simultaneous Detection of Cryptosporidium spp., Giardia duodenalis and Dientamoeba fragilis
Source: MDPI journal article supplement (doi:10.3390/pathogens11111277), 2022-10-31
Supplement: s1 [file s1]

## Supplementary Materials

**Table S1.** Diagnostic performance of commercially available multiplex real-time PCR assays for the simultaneous detection of *Cryptosporidium* spp., *Giardia duodenalis*, and *D. fragilis*.

| Assay               | Manufacturer       | Pathogen species            | Sensitivity (%) | Specificity (%) |
|---------------------|--------------------|-----------------------------|-----------------|-----------------|
| AllPlex GI Panel    | Seegene            | <i>Cryptosporidium</i> spp. | 1               | 0.99–1          |
|                     |                    | <i>G. duodenalis</i>        | 0.97–0.99       | 0.98–1          |
|                     |                    | <i>D. fragilis</i>          | 0.97–1          | 0.94            |
| EasyScreen          | Genetic Signatures | <i>Cryptosporidium</i> spp. | 1               | 1               |
|                     |                    | <i>G. duodenalis</i>        | 0.92            | 1               |
|                     |                    | <i>D. fragilis</i>          | 0.95            | 1               |
| FTD Stool Parasites | Fast Track         | <i>Cryptosporidium</i> spp. | 0.53–0.98       | 0.99–1          |
|                     |                    | <i>G. duodenalis</i>        | 0.90–1          | 0.93            |
|                     |                    | <i>D. fragilis</i>          | 1               | 0.98–1          |
| NanoCHIP            | Savyon Diagnostics | <i>Cryptosporidium</i> spp. | 0.98–1          | 0.95–1          |
|                     |                    | <i>G. duodenalis</i>        | 0.98–1          | 0.95–1          |
|                     |                    | <i>D. fragilis</i>          | 1               | 1               |
| RIDAGENE            | R-Biopharm         | <i>Cryptosporidium</i> spp. | 0.86–0.92       | 1               |
|                     |                    | <i>G. duodenalis</i>        | 0.92            | 0.99            |
|                     |                    | <i>D. fragilis</i>          | 0.25–0.79       | 0.98            |
| Tib MolBiol         | Roche Diagnostics  | <i>Cryptosporidium</i> spp. | 0.86            | 0.99            |
|                     |                    | <i>G. duodenalis</i>        | 0.97            | 0.99            |
|                     |                    | <i>D. fragilis</i>          | 0.99            | 0.99            |
